# Supplementary material for: Simple strategy to suppress the thermal effect for multi-element analysis in sulfide minerals by LA-ICP-MS with a cryogenic ablation cell
Source: Royal Society of Chemistry journal article supplement (doi:10.1039/d4ja00021h), 2024-01-01
Supplement: d4ja00021h1.pdf [file d4ja00021h1.pdf]

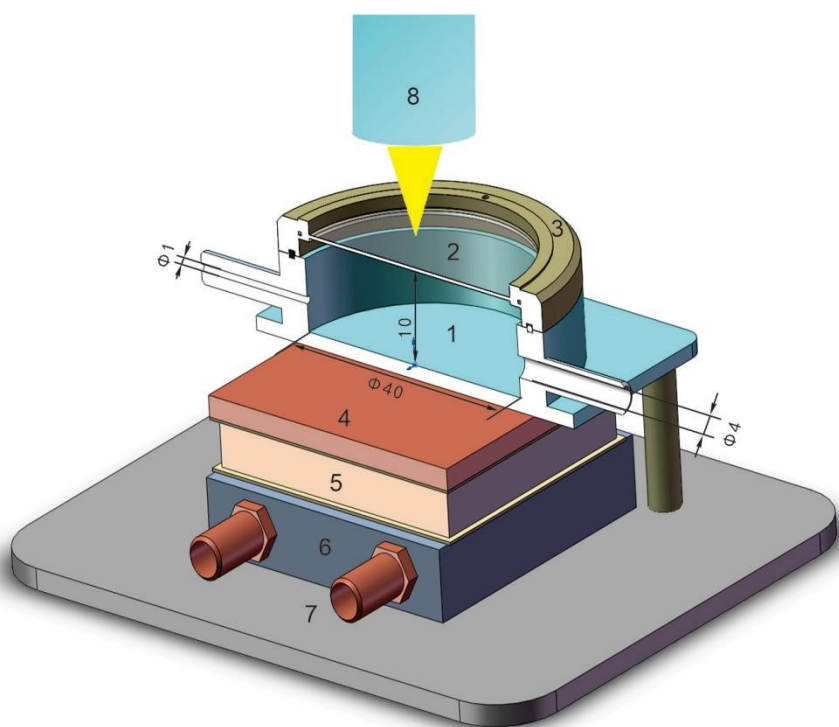

Figure S1. Mechanism diagram of ablation cell (1—the ablation cell; 2—calcium fluoride window; 3—the lid made of PEEK; 4—the thermally conductive copper plate; 5—peltier element; 6—the water-cooled platform; 7—baseplate; 8—the laser).

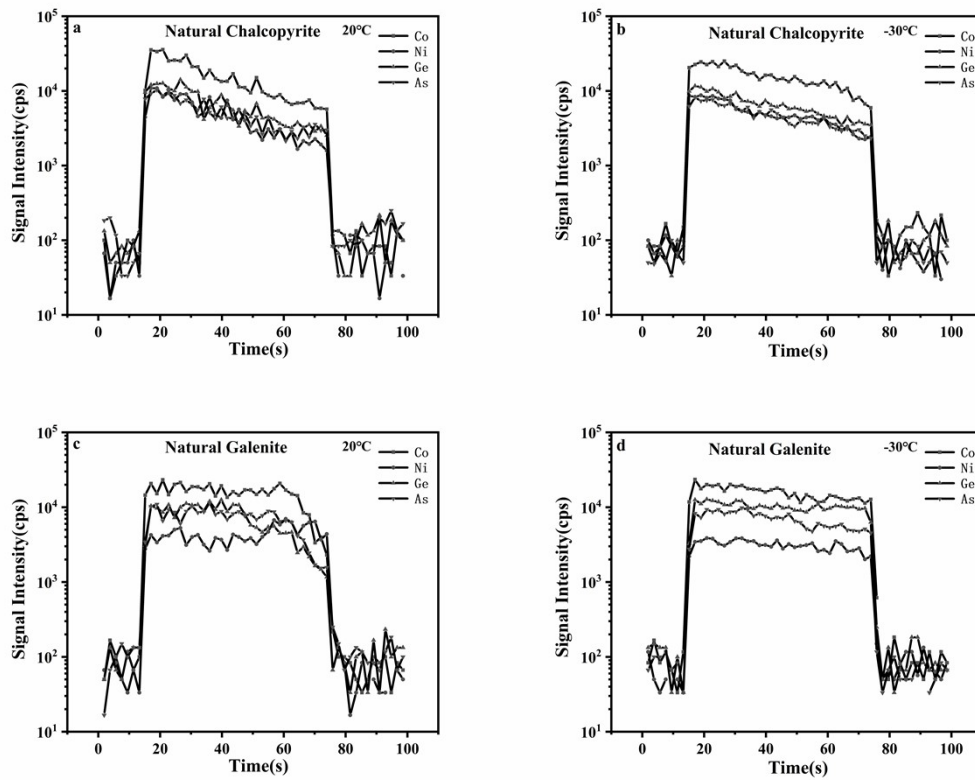

Figure S2. The time-resolved signals at various ablation temperatures (a-natural chalcopyrite at 20 °C, b-natural chalcopyrite at -30 °C, c-natural galenite at 20 °C, d-natural galenite at -30 °C).

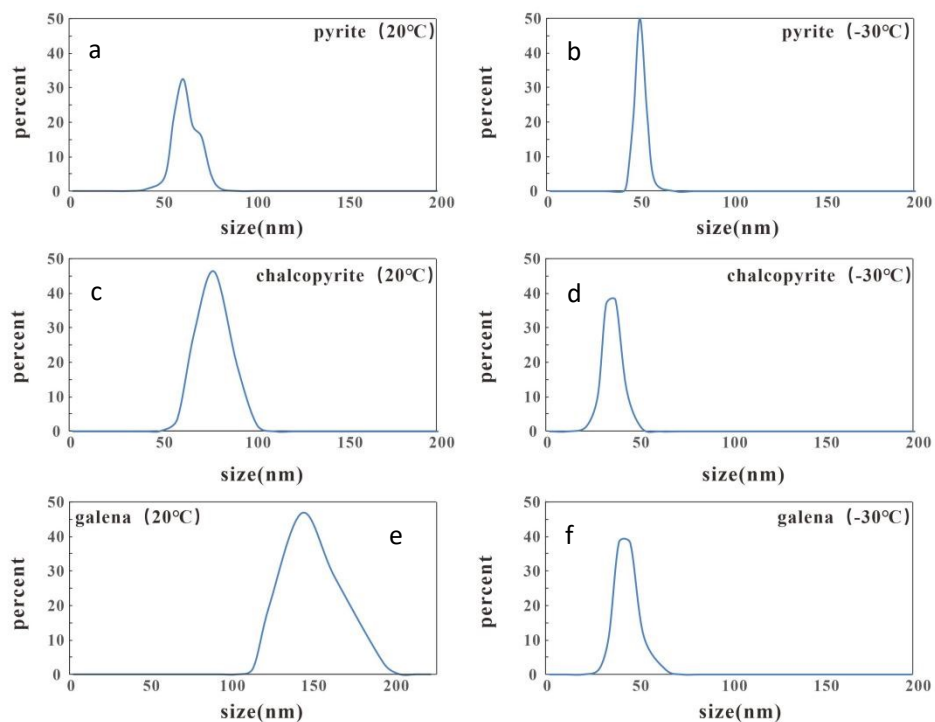

Figure S3. The ablated aerosol particle distribution following laser ablation of three natural sulfides at varying temperatures (a-pyrite crystal at 20 °C, b-pyrite crystal at -30 °C, c-chalcopyrite crystal at 20 °C, d-chalcopyrite crystal at -30 °C, e-galena crystal at 20 °C, f-galena crystal at -30 °C. Ablation conditions: laser energy density is 6 J/cm<sup>2</sup>, ablation time is 60 seconds).
